# Supplementary material
Source: PubMed Central journal article supplement (PMC5768236)

Gel source data - western blots

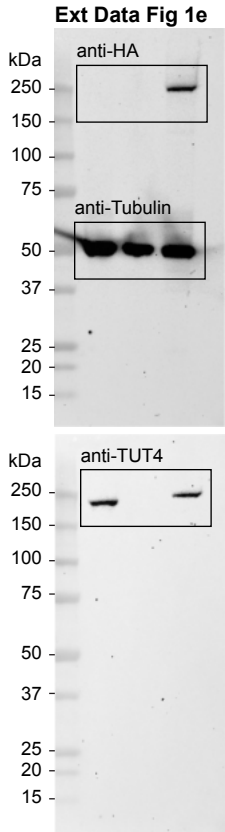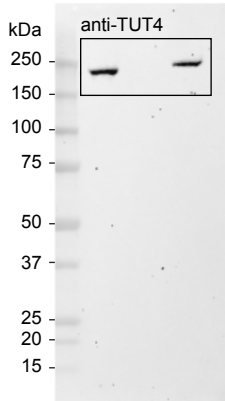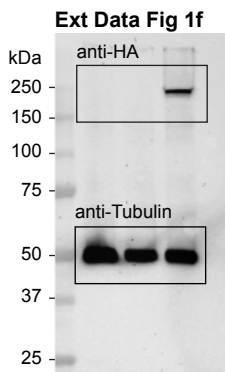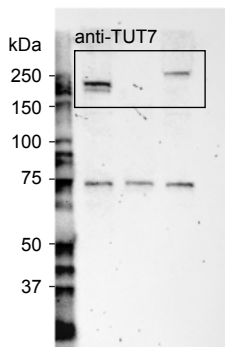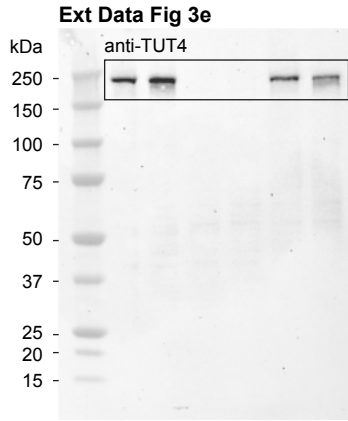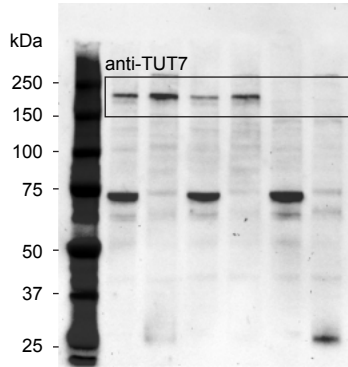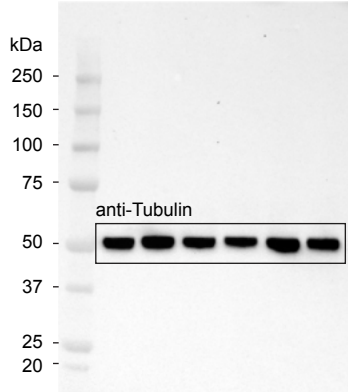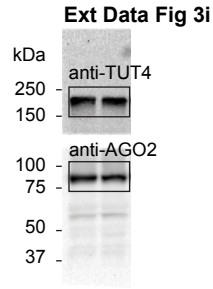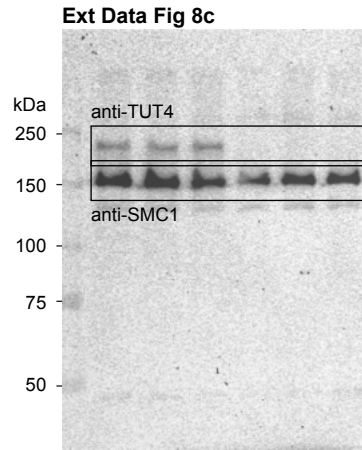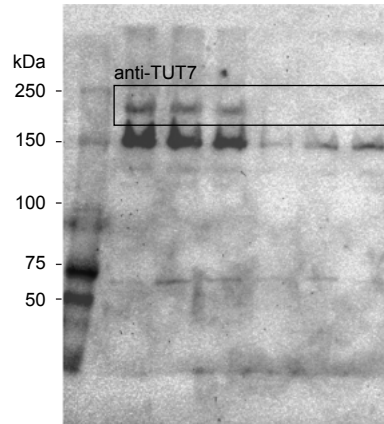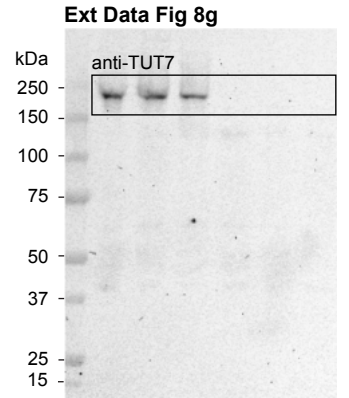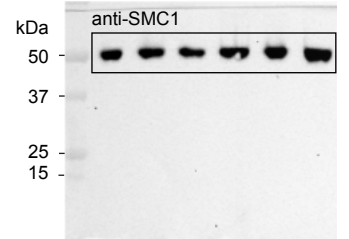

Gel source data - Southern blots

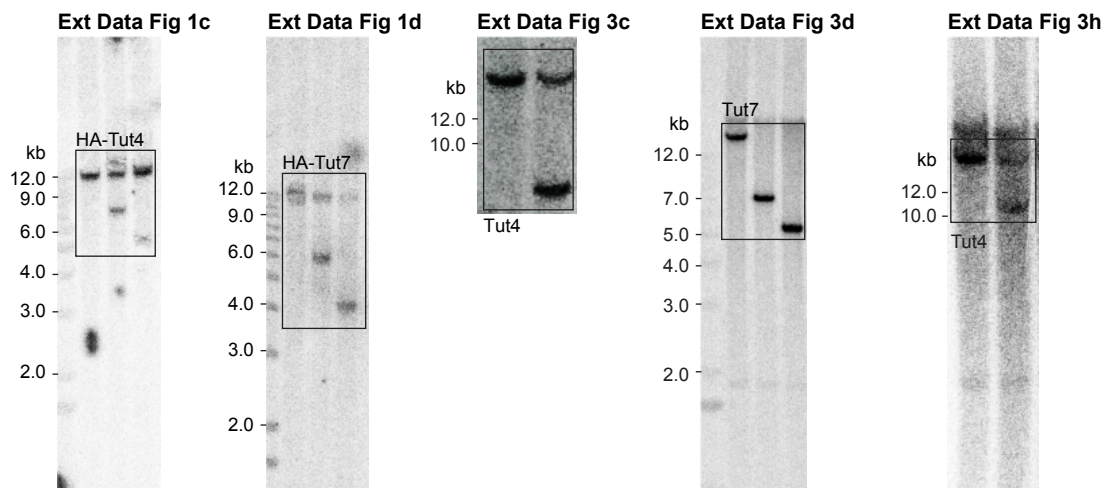

Ext Data Fig 7e

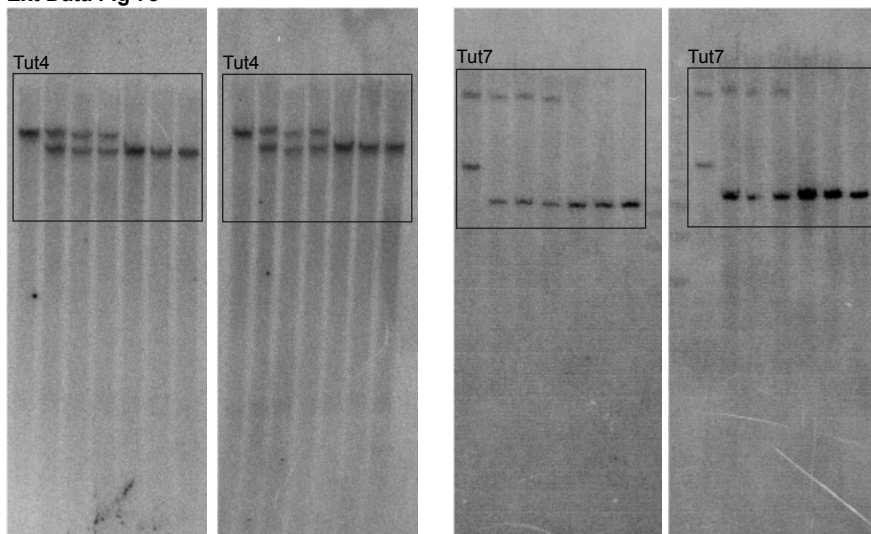

Ext Data Fig 8b

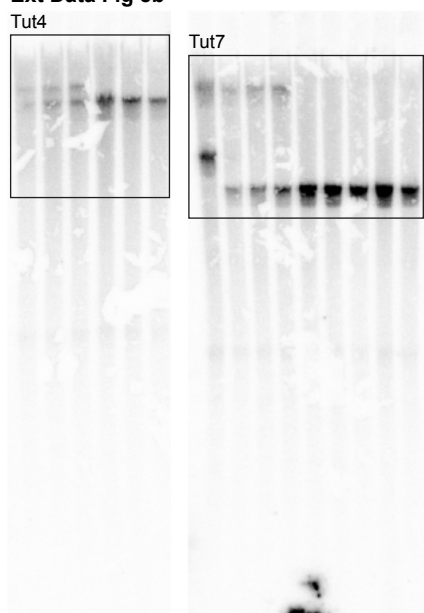

Ext Data Fig 8f

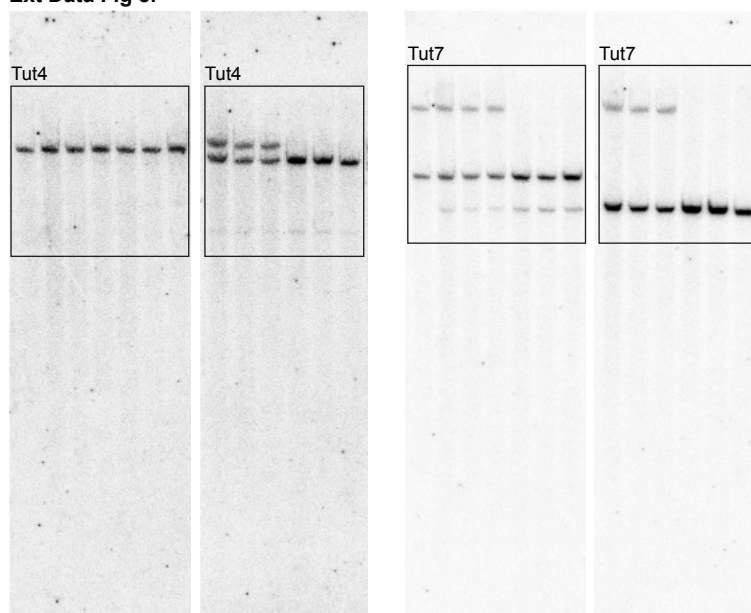

Supplement: NIHMS73169-supplement-Gel_source_data.pdf [file NIHMS73169-supplement-Gel_source_data.pdf]
